# Supplementary material for: Unsaturated alginate oligosaccharides attenuated obesity-related metabolic abnormalities by modulating gut microbiota in high-fat-diet mice
Source: Royal Society of Chemistry journal article supplement (doi:10.1039/c9fo02857a), 2020-01-01
Supplement: c9fo02857a2.pdf [file c9fo02857a2.pdf]

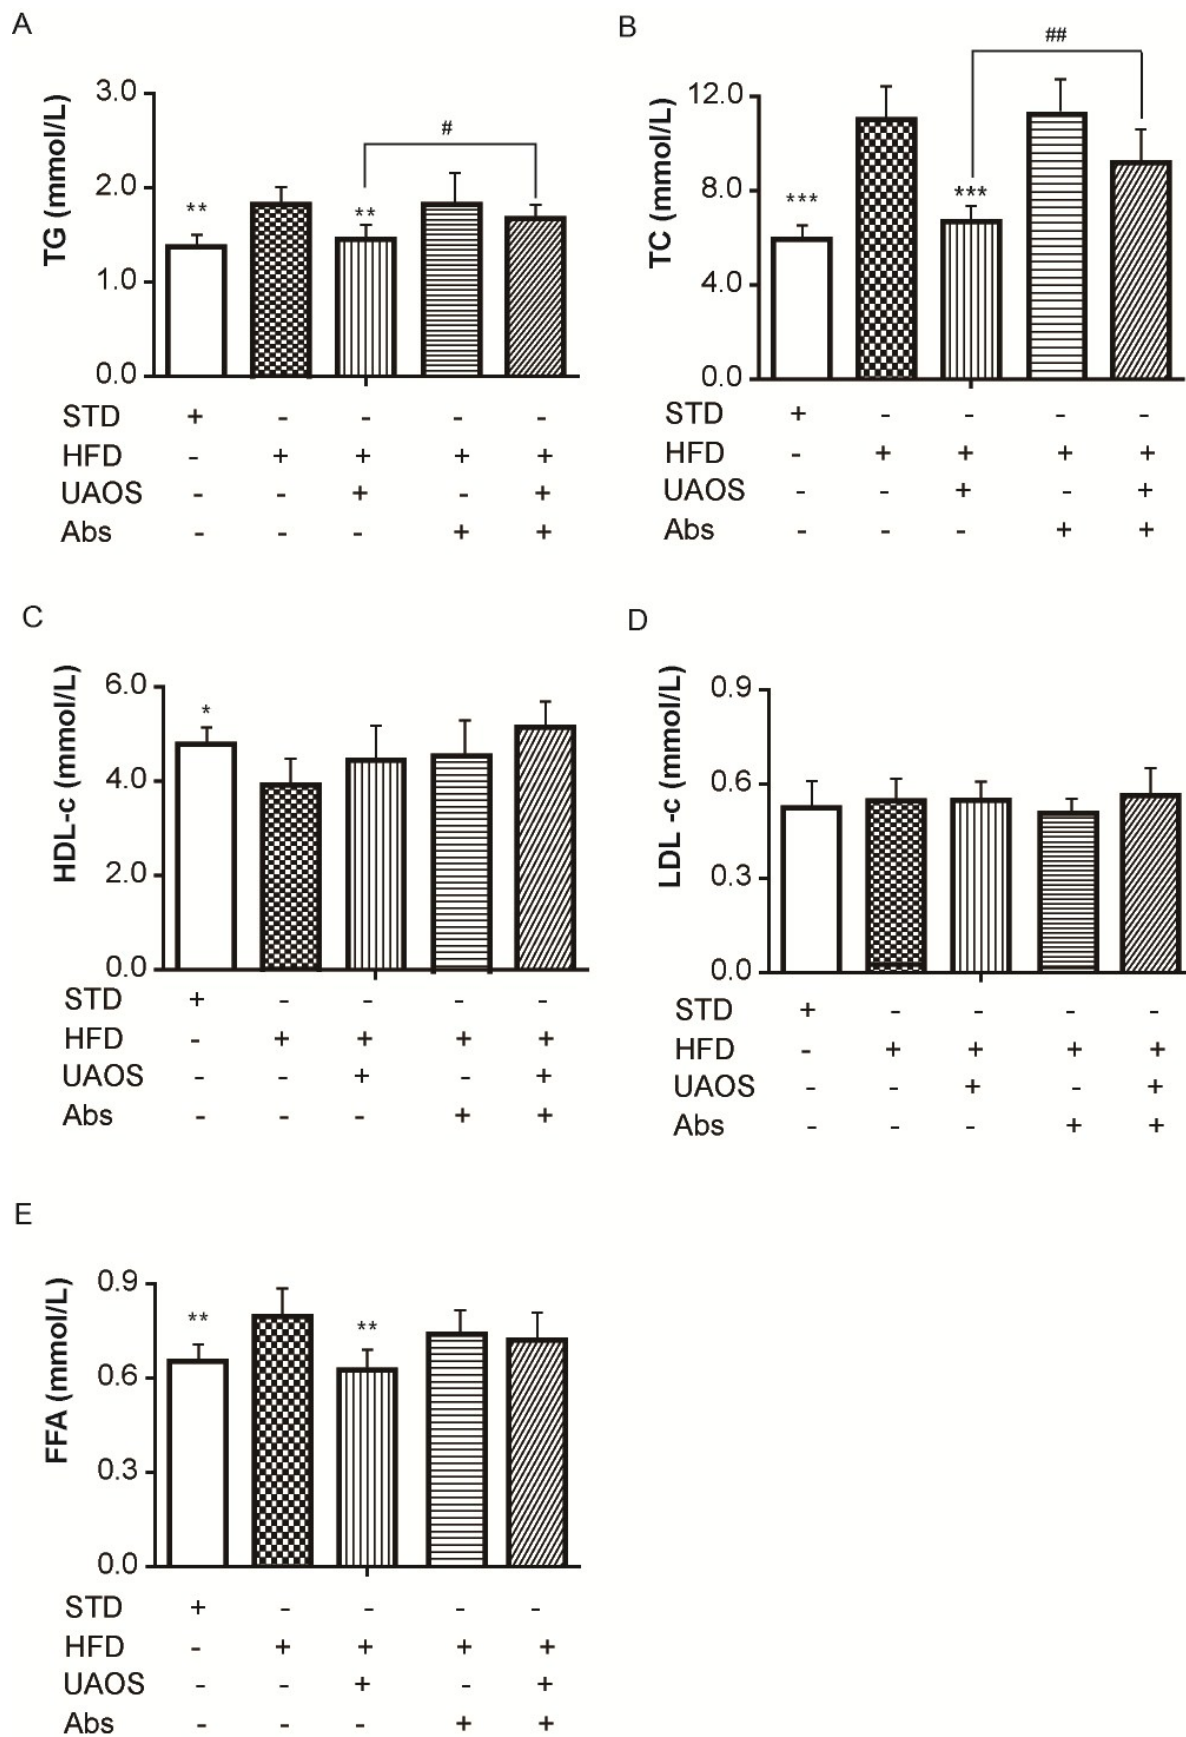

**Figure S1. Effects of UAOS and antibiotics treatment on serum lipid in HFD-fed mice.** Change in TG levels (A), TC levels (B), HDL-c levels (C), LDL-c levels (D), and FFA levels (E). The data are represented as means  $\pm$  standard deviation (SD, n= 8). Compare to HFD group, \* p < 0.05, \*\* p < 0.01, \*\*\* p < 0.001. Compare to indicated groups, # p < 0.05, ## p<0.01.

**Table S1. The primers sequences used for PCR reaction.**

| <b>Gene name</b> | <b>Primers sequences</b>                                                     |
|------------------|------------------------------------------------------------------------------|
| TNF- $\alpha$    | Forward: 5'-TAGCCAGGAGGGAGAACAGA-3'<br>Reverse: 5'-TTTTCTGGAGGGAGATGTGG-3'   |
| IL-1 $\beta$     | Forward: 5'-TTGAAGAAGAGCCCATCCTC -3'<br>Reverse: 5'-CAGCTCATATGGGTCCGAC -3'  |
| IL-6             | Forward: 5'-CCGGAGAGGAGACTTCAC-3'<br>Reverse: 5'-TCCACGATTTCCCAGAGA-3'       |
| IL-10            | Forward: 5'-GCTCTTACTGACTGGCATGAG -3'<br>Reverse: 5'-CGCAGCTCTAGGAGCATGTG-3' |
| PAI-1            | Forward: 5'-TCAGCCCTTGCTTGCCAT-3'<br>Reverse: 5'-GCATAGCCAGCACCGAGGA-3'      |
